# Supplementary material for: Real-Time PCR for Diagnosing and Quantifying Co-infection by Two Globally Distributed Fungal Pathogens of Wheat
Source: PubMed Central journal article supplement (PMC6095046; doi:10.3389/fpls.2018.01086), 2018-08-09
Supplement: Image_1.pdf [file Image_1.pdf]

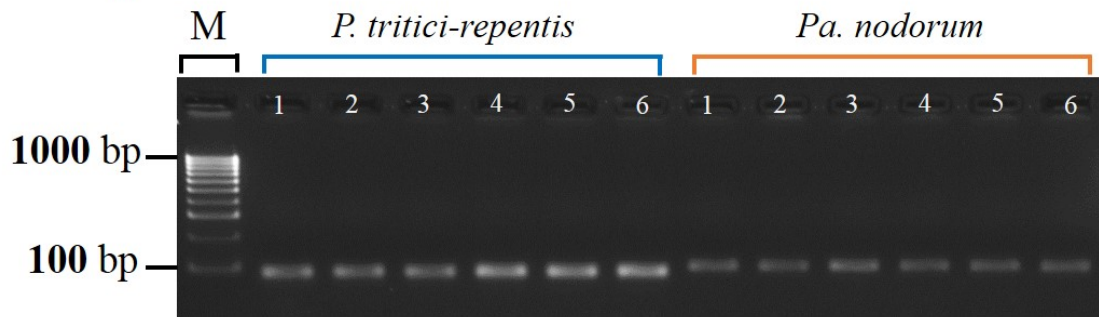

Supplementary figure 1. PCR testing of *P. tritici-repentis* amplicons (99-bp) as compared in size to *Pa. nodorum* amplicons (112-bp). Reactions were run in six replicates.
